# Supplementary material for: Hypoxia Engineered Bone Marrow Mesenchymal Stem Cells Targeting System with Tumor Microenvironment Regulation for Enhanced Chemotherapy of Breast Cancer
Source: MDPI journal article supplement (doi:10.3390/biomedicines9050575), 2021-05-19
Supplement: s1 [file s1]

## Article

# Hypoxia Engineered Bone Marrow Mesenchymal Stem Cells Targeting System with Tumor Microenvironment Regulation for Enhanced Chemotherapy of Breast Cancer

Jingzhi Zu <sup>1,†</sup>, Liwei Tan <sup>1,2,3,†</sup>, Li Yang <sup>4</sup>, Qi Wang <sup>2</sup>, Jing Qin <sup>2</sup>, Jing Peng <sup>2</sup>, Hezhong Jiang <sup>2</sup>, Rui Tan <sup>1,2,\*</sup> and Jian Gu <sup>5,\*</sup>

<sup>1</sup> College of Medicine, Southwest Jiaotong University, Chengdu 610031, China; jz578060490@163.com (J.Z.); rafael0927@163.com (L.T.)

<sup>2</sup> College of Life Science and Engineering, Southwest Jiaotong University, Chengdu 610031, China; wangqi20210122@163.com (Q.W.); QJ1473829841@163.com (J.Q.); pj554820@163.com (J.P.); jianghz10@sina.com (H.J.)

<sup>3</sup> Sichuan Purity Pharmaceutical Technology Co., Ltd., 3-1 Jiuxing Ave, Hi-Tech Zone, Chengdu 610041, China

<sup>4</sup> School of Materials Science and Engineering, Southwest Jiaotong University, Chengdu 610031, China; l.yang2012@foxmail.com

<sup>5</sup> School of Pharmacy, Southwest University for Nationalities, Chengdu 610051, China

\* Correspondence: tanruiswjtu@sohu.com or tanrui@swjtu.edu.cn (R.T.); gujiancd@163.com (J.G.)

† Jingzhi Zu and Liwei Tan are the co-first authors for this work.

**Table S1.** Drug loading of the complexes with different DTX concentration.

| Concentration (μM) | Intracellular DTX (pg/cell) |               |
|--------------------|-----------------------------|---------------|
|                    | DTX@bMSCs                   | DTX@H-bMSCs   |
| 10                 | 11.11 ± 0.35                | 10.01 ± 2.15  |
| 20                 | 23.59 ± 3.57                | 23.13 ± 4.99  |
| 30                 | 73.87 ± 3.33                | 67.87 ± 7.37  |
| 40                 | 152.90 ± 0.47               | 145.91 ± 5.54 |
| 50                 | 156.32 ± 2.03               | 152.27 ± 7.23 |
| 60                 | 172.75 ± 7.93               | 175.15 ± 8.42 |

These samples in each group and the values were mean ± SEM.

**Table S2.** Drug loading of the complexes with 40μM DTX concentration at different times.

| Time (h) | Intracellular DTX (pg/cell) |               |                 |                |
|----------|-----------------------------|---------------|-----------------|----------------|
|          | Free C6@bMSCs               | DTX@bMSCs     | Free C6@H-bMSCs | DTX@H-bMSCs    |
| 0.5      | 3.05 ± 1.43                 | 9.74 ± 1.93   | 5.50 ± 1.85     | 13.07 ± 2.30   |
| 1        | 11.53 ± 4.68                | 38.50 ± 7.19  | 13.95 ± 2.51    | 38.61 ± 4.51   |
| 2        | 34.66 ± 4.33                | 72.32 ± 5.46  | 24.90 ± 5.87    | 63.69 ± 3.09   |
| 4        | 57.63 ± 12.84               | 135.54 ± 7.23 | 64.02 ± 7.39    | 141.05 ± 10.07 |
| 6        | 66.15 ± 8.75                | 148.31 ± 8.22 | 71.05 ± 5.53    | 150.90 ± 8.23  |
| 8        | 76.63 ± 9.06                | 158.34 ± 7.34 | 81.22 ± 7.48    | 158.02 ± 10.55 |

These samples in each group and the values were mean ± SEM.

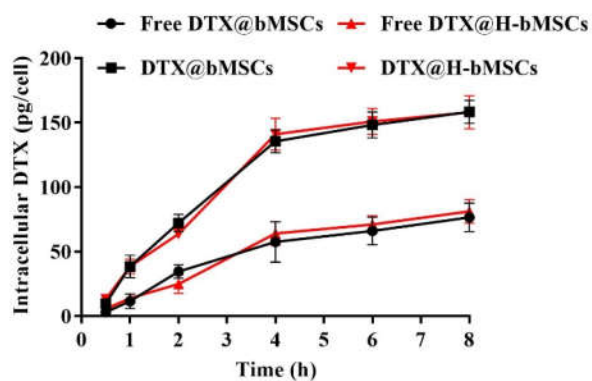

Figure S1. Drug loading of the complexes at different times.

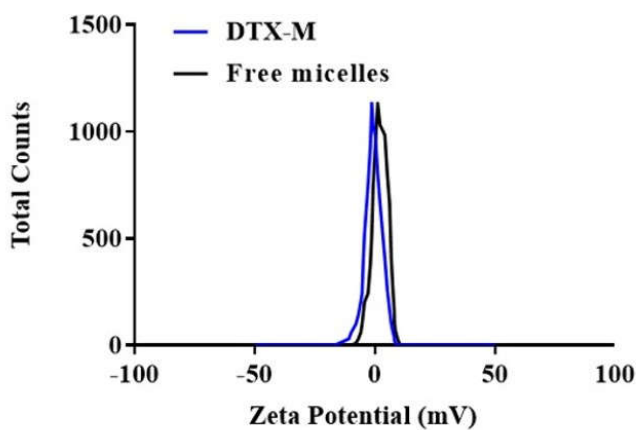

Figure S2. The zeta potential of DTX-M and blank micelles.

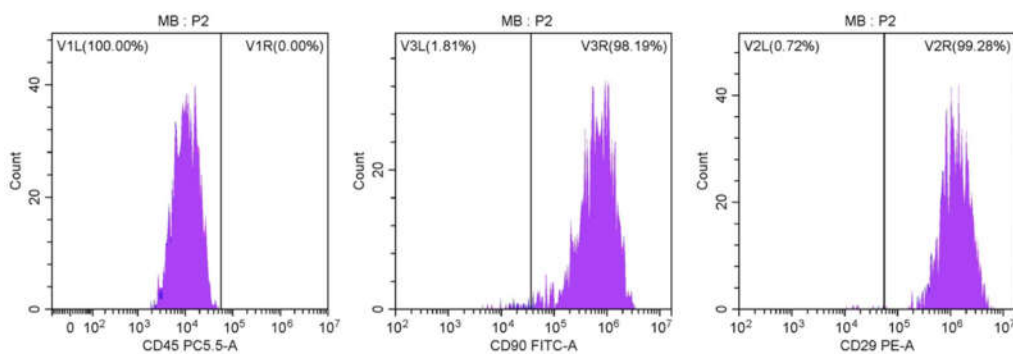

Figure S3. Identification of the bMSCs isolated from BALB/c mice by flow cytometry.

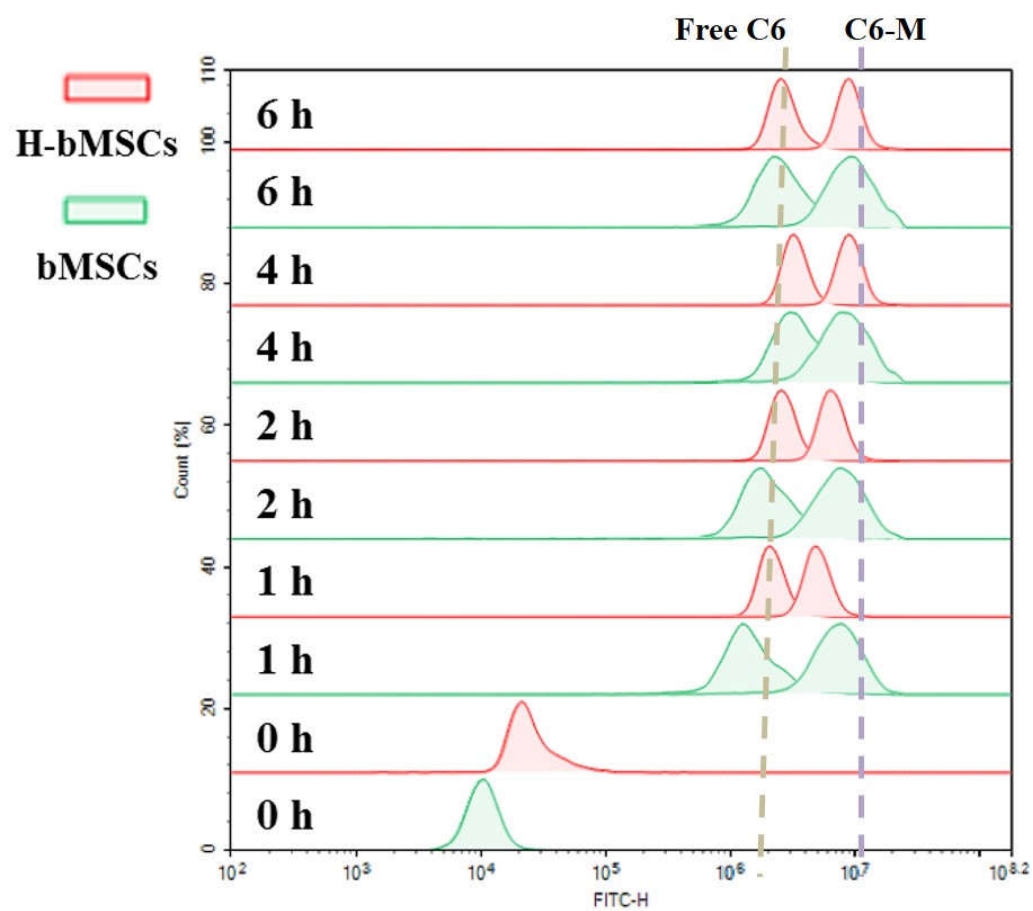

Figure S4. Flow cytometry analysis of cellular uptake ability at different co-incubation time.

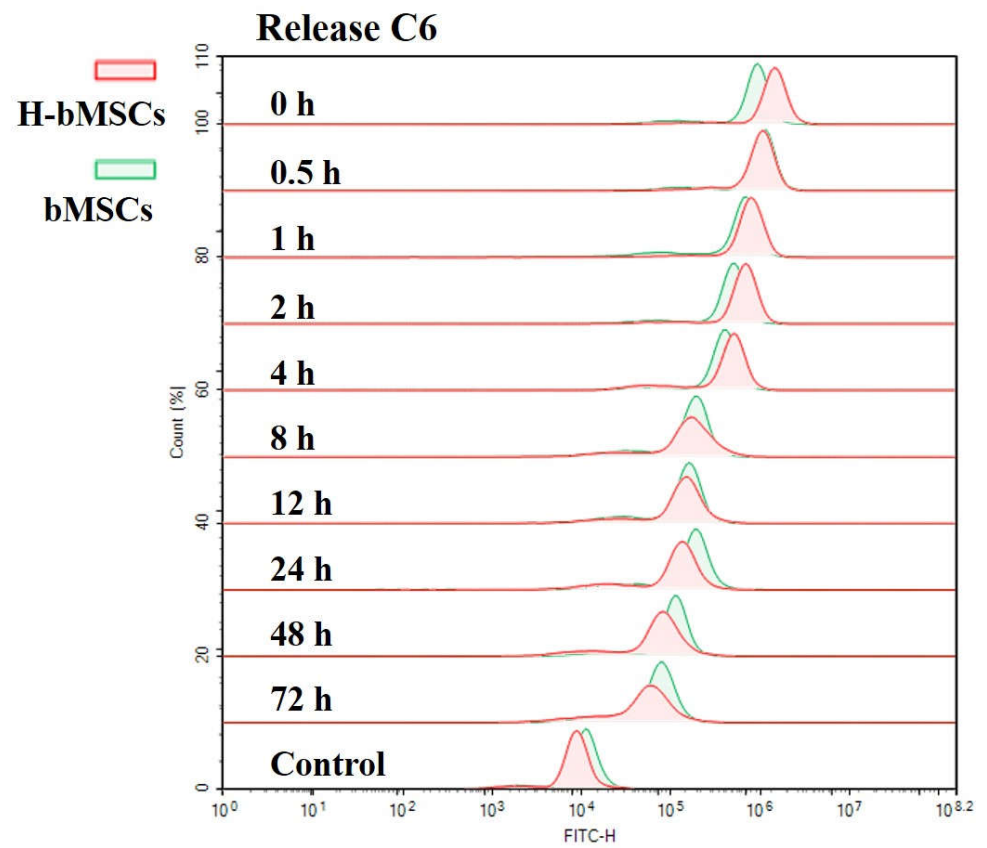

**Figure S5.** Flow cytometry analysis of the release behavior from H-bMSCs or bMSCs.
